# Supplementary material for: Fine needle aspirate flow cytometric phenotyping characterizes immunosuppressive nature of the mesothelioma microenvironment
Source: PubMed Central journal article supplement (PMC4990967; doi:10.1038/srep31745), 2016-08-19
Supplement: srep31745-s1.pdf [file srep31745-s1.pdf]

## **Fine needle aspirate flow cytometric phenotyping characterizes immunosuppressive nature of the mesothelioma microenvironment**

Patrick H Lizotte<sup>1,2</sup>, Robert E Jones<sup>1,2</sup>, Lauren Keogh<sup>1,2</sup>, Elena Ivanova<sup>1,2</sup>, Hongye Liu<sup>1,2</sup>, Mark M Awad<sup>2,3,7</sup>, Peter S Hammerman<sup>2,3,7</sup>, Ritu R Gill<sup>2,4</sup>, William G Richards<sup>5,6,7</sup>, David A Barbie<sup>2,7</sup>, Adam J Bass<sup>2,7</sup>, Raphael Bueno<sup>5,6,7</sup>, Jessie M. English<sup>1,2</sup>, Mark Bittinger<sup>1,2</sup>, Kwok-Kin Wong<sup>1,2,3,7,\*</sup>

<sup>1</sup>Belfer Center for Applied Cancer Science 360 Longwood Ave. Boston, MA 02115

<sup>2</sup>Department of Medical Oncology and <sup>3</sup>Lowe Center for Thoracic Oncology  
Dana-Farber Cancer Institute 450 Brookline Ave Boston, MA 02115

<sup>4</sup>Department of Radiology, <sup>5</sup>Division of Thoracic Surgery, <sup>6</sup>International Mesothelioma Program of the Lung Center Surgery at Brigham and Women's Hospital 75 Francis St. Boston, MA 02115

<sup>7</sup>Harvard Medical School 25 Shattuck St, Boston, MA 02115

\*Corresponding author: Kwok-Kin Wong, Dana-Farber Cancer Institute 450 Brookline Avenue Boston, MA 02215, phone 617-632-6084, fax 617-582-7683, e-mail [kwok-kin\\_wong@dfci.harvard.edu](mailto:kwok-kin_wong@dfci.harvard.edu)

Financial support: Robert A. and Renée E. Belfer Foundation, Expect Miracles Foundation, Starr Consortium for Cancer Research, the Damon Runyon Cancer Research Foundation, and Stand Up 2 Cancer Foundation (SU2C).

- |                          |                           |
|--------------------------|---------------------------|
| [1] %CD45+               | [21] % CD4 TIM3+PD-1-     |
| [2] %CD3+ T cells        | [22] % CD4 TIM3-PD-1-     |
| [3] %CD33+ Monocytes     | [23] % CD4 LAG3-PD-1+     |
| [4] %CD66b+ Granulocytes | [24] % CD4 LAG3+PD-1+     |
| [5] %CD4 T cells         | [25] % CD4 LAG3+PD-1-     |
| [6] %CD8 T cells         | [26] % CD4 LAG3-PD-1-     |
| [7] CD8 vs CD4 ratio     | [27] % CD4 TIM-3          |
| [8] % CD8 TIM3-PD1+      | [28] % CD4 PD-1           |
| [9] % CD8 TIM3+PD-1+     | [29] % CD4 LAG-3          |
| [10] % CD8 TIM3+PD-1-    | [30] %CD33 PD-L2-PD-L1+   |
| [11] % CD8 TIM3-PD-1-    | [31] % CD33 PD-L2+PD-L1+  |
| [12] % CD8 LAG3-PD-1+    | [32] % CD33 PD-L2+PD-L1-  |
| [13] % CD8 LAG3+PD-1+    | [33] % CD33 PD-L2-PD-L1-  |
| [14] % CD8 LAG3+PD-1-    | [34] % CD33 PD-L1         |
| [15] % CD8 LAG3-PD-1-    | [35] % CD33 PD-L2         |
| [16] % CD8 TIM-3         | [36] %CD66b PD-L2-PD-L1+  |
| [17] % CD8 PD-1          | [37] % CD66b PD-L2+PD-L1+ |
| [18] % CD8 LAG-3         | [38] % CD66b PD-L2+PD-L1- |
| [19] % CD4 TIM3-PD1+     | [39] % CD66b PD-L2-PD-L1- |
| [20] % CD4 TIM3+PD-1+    | [40] % CD66b PD-L1        |
|                          | [41] % CD66b PD-L2        |

Supplementary Figure 1. List of 41 parameters used for hierarchical clustering in Figure 4. A subset of these was also used for tSNE in Figure 2.

**A**

|                 |         | Name       | ID   | Fluorochrome  |             |               |             |             |        |        |
|-----------------|---------|------------|------|---------------|-------------|---------------|-------------|-------------|--------|--------|
|                 |         |            |      | AF488         | PE          | PerCp-Cy5.5   | APC         | PacBlue     | PE-Cy7 | APC-H7 |
| Immune Analysis | Surface | Lympho*    | 1    | CD56          | <b>CD8</b>  | CD16          | <b>CD3</b>  | CD45        | CD19   | CD4    |
|                 |         | T1*        | 2    | CD4           | CD38        | <b>HLA-DR</b> | CD45RA      | CCR7        | CD3    | CD8    |
|                 |         | T2         | 3    | CD45          | Tim-3       | CD8           | <b>LAG3</b> | CD3         | PD-1   | CD4    |
|                 |         | T2 iso     | 4    | CD45          | iso         | CD8           | <b>iso</b>  | CD3         | iso    | CD4    |
|                 |         | T3         | 5    | CD4           | Tim3        | CD8           | CD45RO      | CD3         | PD-1   | CD45RA |
|                 |         | T4         | 6    | <b>CD11a</b>  | <b>CD69</b> | CD8           | CXCR3       | CD3         | PD-1   | CD4    |
|                 |         | Myelo*     | 7    | CD45          | CD66b       | <b>HLA-DR</b> | CD33        | CD14        | CD123  | CD16   |
|                 |         | Tumor*     | 8    | CD45          | PD-L2       | CD66b         | PD-L1       | CD33        | EpCAM  | CD14   |
|                 |         | Tumor iso* | 9    | CD45          | iso         | CD66b         | iso (PD-L1) | CD33        | EpCAM  | CD14   |
| Intra           | T1      | 10         | CD45 | <b>CTLA-4</b> | CD8         | <b>FOXP3</b>  | CD3         | PD-1        | CD4    |        |
|                 | T2      | 11         | CD45 | <b>iso</b>    | CD8         | <b>FOXP3</b>  | CD3         | iso         | CD4    |        |
|                 | T3      | 12         | CD45 | Tim-3         | CD8         | <b>FOXP3</b>  | CD3         | <b>Ki67</b> | CD4    |        |
| Sorting         |         | 1          | CD45 | CD56          | CD8         | CD33          | EpCAM       | CD4         | CD16   |        |

**B**

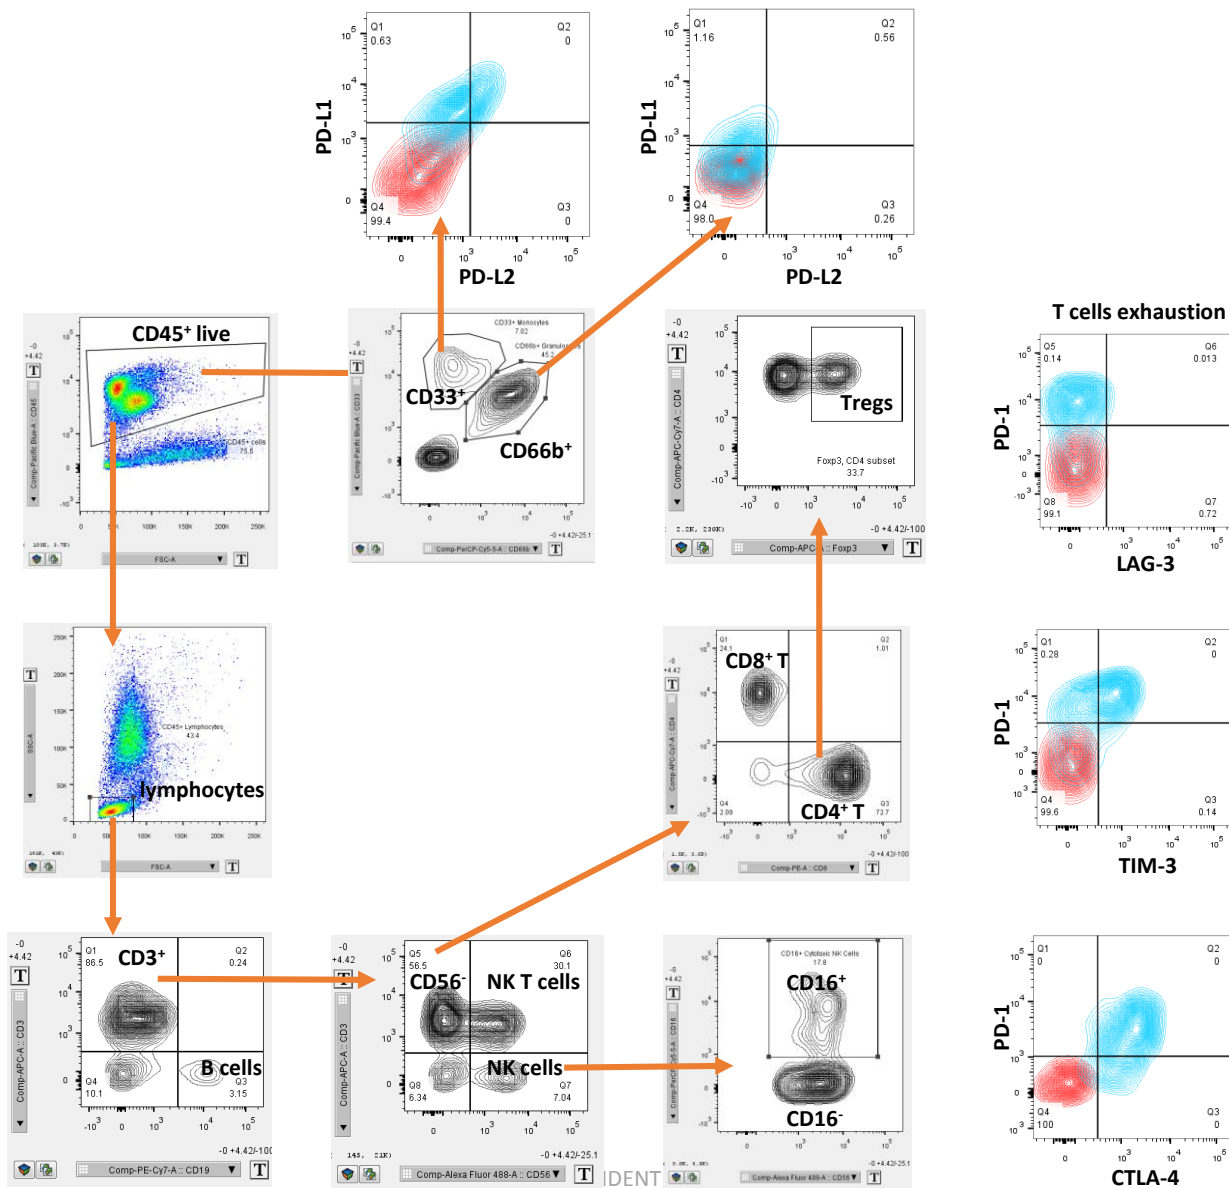

Supplementary Figure 2. A, Table of antibody panels with surface markers (black) and intracellular markers (red). B, Flow cytometry gating progression based on lineage markers. Lymphocytes and myeloid cells are assayed for expression of immunomodulatory phenotypic markers.

A

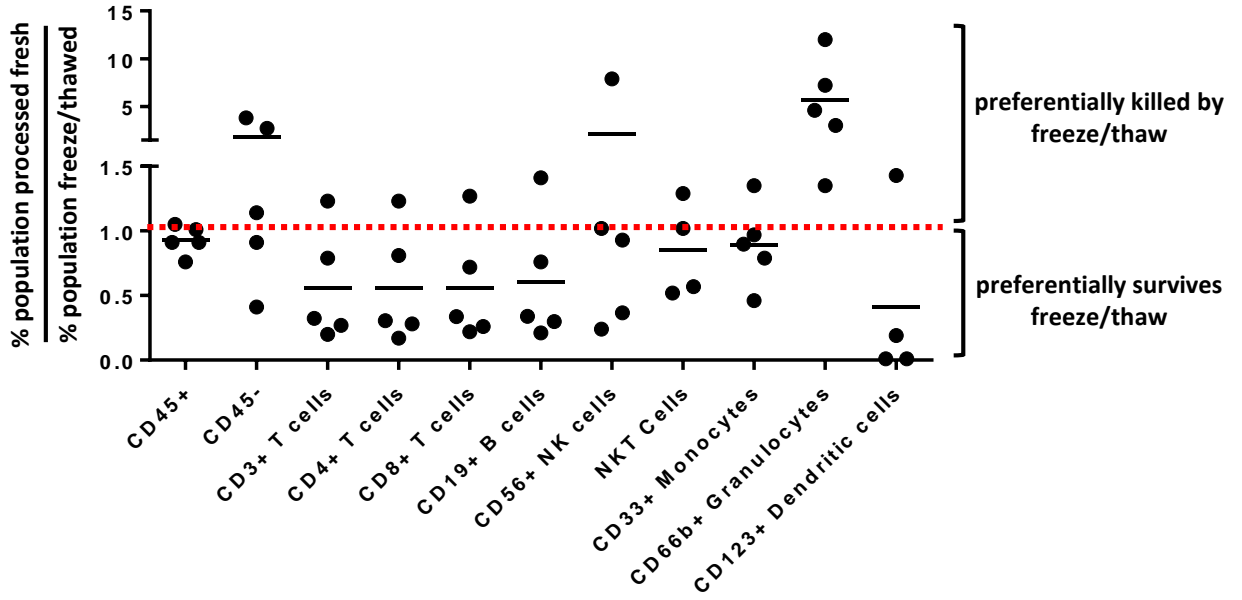

Supplementary Figure 3. Freeze/thaw preferentially kills CD45- cells and granulocytes while lymphocytic population proportions are unaffected. Tumor samples included one pleural effusion, one NSCLC, and three mesotheliomas.

| patient | sample type      | live cells per sample |
|---------|------------------|-----------------------|
|         | peripheral blood | 130,000               |
| A       | FNA              | 73,000                |
|         | resected tumor   | 194,000               |
|         | peripheral blood | 95,000                |
| B       | FNA              | 18,000                |
|         | resected tumor   | 220,000               |
|         | peripheral blood | 112,000               |
| D       | FNA              | 2,400                 |
|         | resected tumor   | 300,000               |
|         | peripheral blood | 64,000                |
| F       | FNA              | 27,000                |
|         | resected tumor   | 43,000                |
|         | peripheral blood | 69,000                |
| H       | FNA              | 78,000                |
|         | resected tumor   | 68,000                |
|         | peripheral blood | 57,000                |
| J       | FNA              | 1,200                 |
|         | resected tumor   | 130,000               |
|         | peripheral blood | 51,000                |
| K       | FNA              | 44,000                |
|         | resected tumor   | 700,000               |
|         | peripheral blood | 65,000                |
| M       | FNA              | 900                   |
|         | resected tumor   | 7,000                 |
|         | peripheral blood | 80,375                |
| average | FNA              | 30,563                |
|         | resected tumor   | 207,750               |

Supplementary Figure 4. List of live cells run by flow cytometry from blood, bulk resected tumor, and FNA biopsy from 8/13 mesothelioma patients whose FNA yielded sufficient cells for analysis.

**A**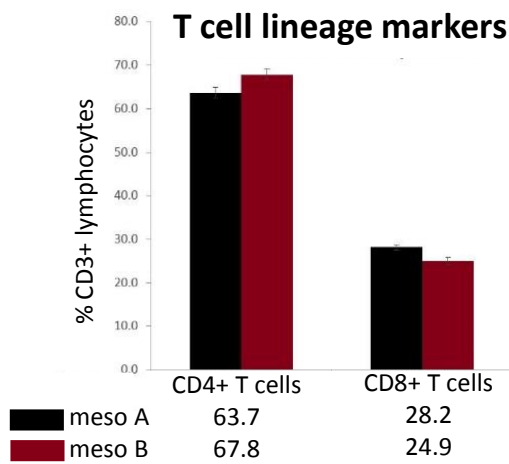**B**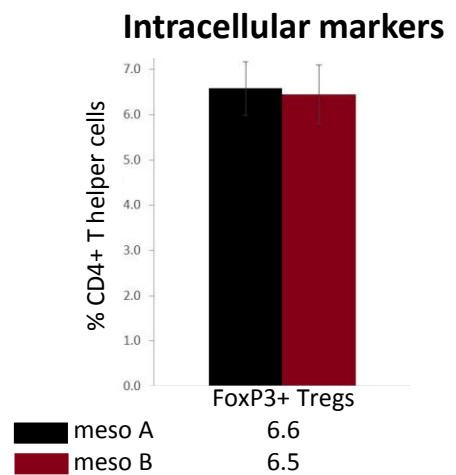**C**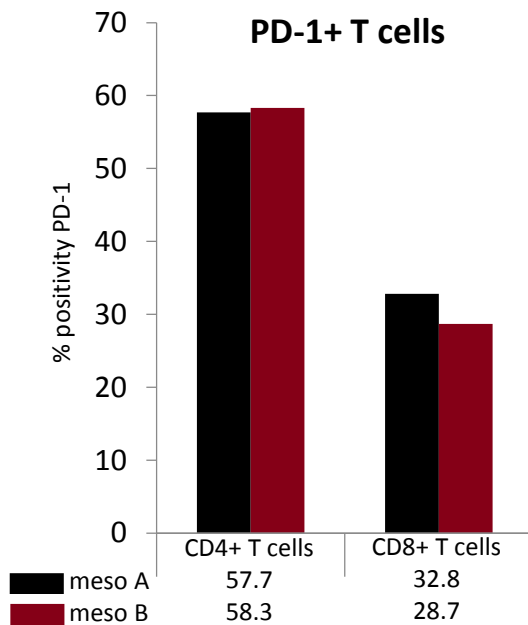**D**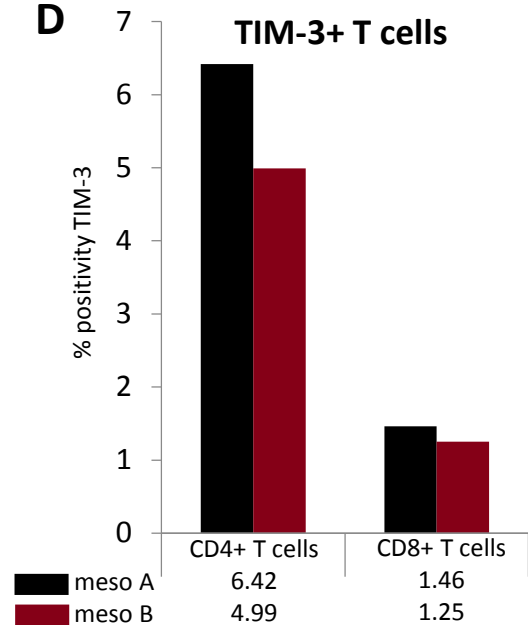

Supplementary Figure 5. Flow cytometric profiling of mesothelioma immune microenvironment is highly accurate and reproducible. A-B, Tissue resection was received in two large pieces and processed separately: dissociation, live/dead staining, FcR block, surface staining (A), and intracellular staining (B) were carried out in parallel. Technical replicates exhibit concordance in % positive surface antigen and intracellular transcription factor staining. C-D, Lymphocytes also show high degree of similarity in expression of phenotypic markers (exhaustion markers PD-1 and TIM-3) between replicates.

**A**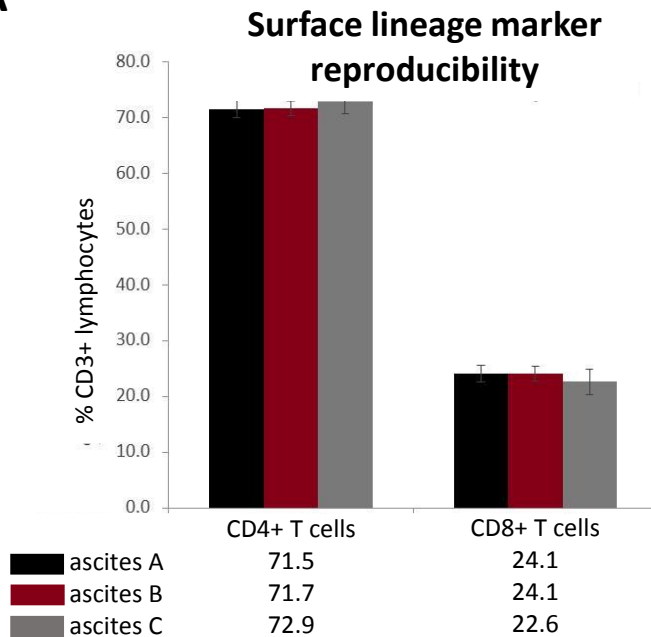**B**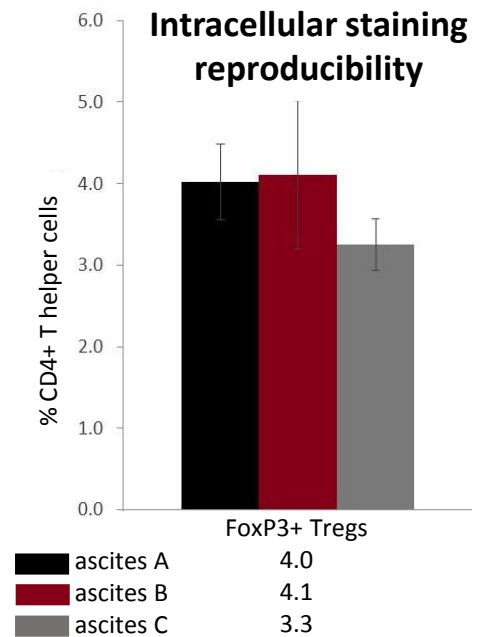

Supplementary Figure 6. Flow cytometric immunophenotyping exhibits consistency with variable cell numbers. A, Ascites fluid from a gastro-intestinal tumor was analyzed by flow cytometry. “Ascites A” and “ascites B” are technical replicates, whereas “ascites C” is a 1:20 cell dilution. Minimal variability is observed even with varying numbers of cells. B, Same experimental design was also assayed for presence of FoxP3+ Tregs. Even at low cell numbers (ascites C) we were able to measure a comparable percentage of Tregs out of the CD4+ T helper cell compartment.

## A CD4+ T cells inhibitory markers

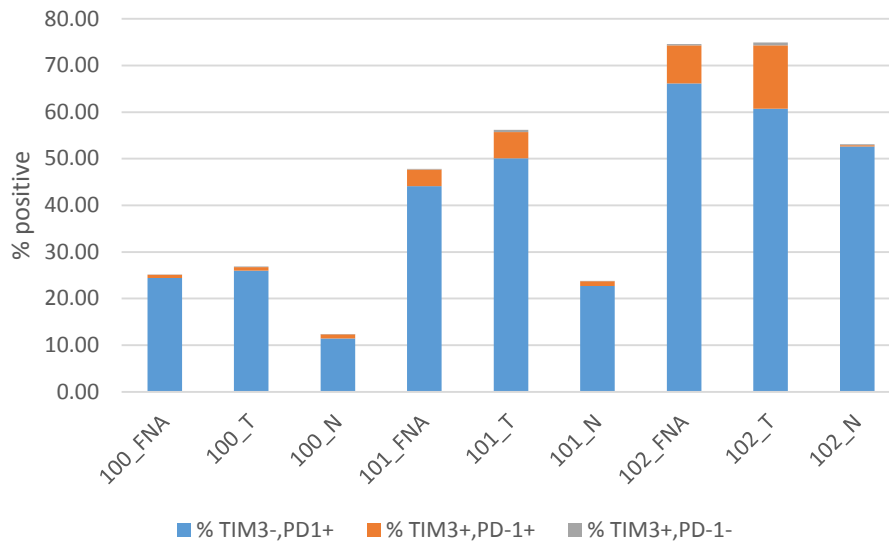

## B CD8+ T cells inhibitory markers

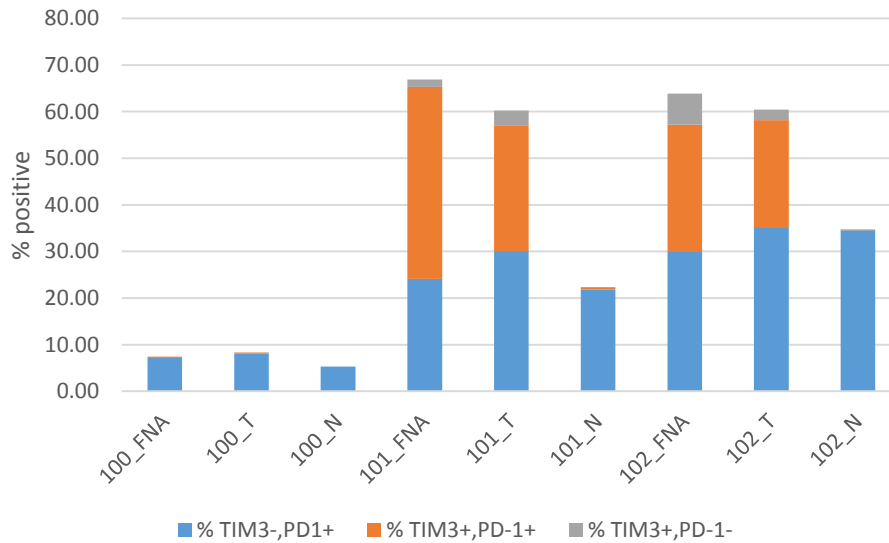

Supplementary Figure 7. Analysis of NSCLC FNA by flow cytometry characterizes tumor immunophenotype. A-B, Immunoprofiling revealed high expression of exhaustion markers on CD4+ T cells (A) and CD8+ T cells (B) on both tumor and FNA, but not normal lung tissue.



### EpCAM+ cells

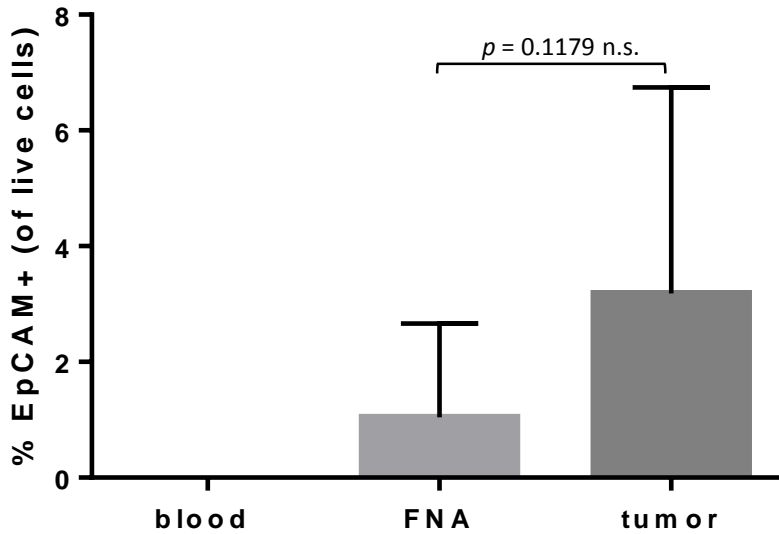

Supplementary Figure 8. Analysis of % EpCAM+ cells in mesothelioma FNA (cases A, B, D, F, H, J, K, M) from Figure 2 by flow cytometry. Blood samples yielded zero EpCAM+ cells vs.  $1.043 \pm 0.6129$  (mean  $\pm$  SEM) for FNA vs.  $3.186 \pm 1.345$  (mean  $\pm$  SEM) for bulk tumor. Data was analyzed using a paired *t*-test and there was no observed significant difference between FNA and bulk tumor.
